# Supplementary material for: Analysis of Ensifer aridi Mutants Affecting Regulation of Methionine, Trehalose, and Inositol Metabolisms Suggests a Role in Stress Adaptation and Symbiosis Development
Source: MDPI journal article supplement (doi:10.3390/microorganisms10020298), 2022-01-26

**Figure S1.** Genetic map of the GSR regulatory genes *rsiA1*, *rsiB1* and *rpoE2*. *Ensifer aridi* predicted encoding genes (PEGs) are shown below gene names. The presence of putative IolR and RpoE2 binding sites in the *rsiB1*-*rsiA1* intergenic sequence are indicated below the genetic map as red and brown boxes respectively.

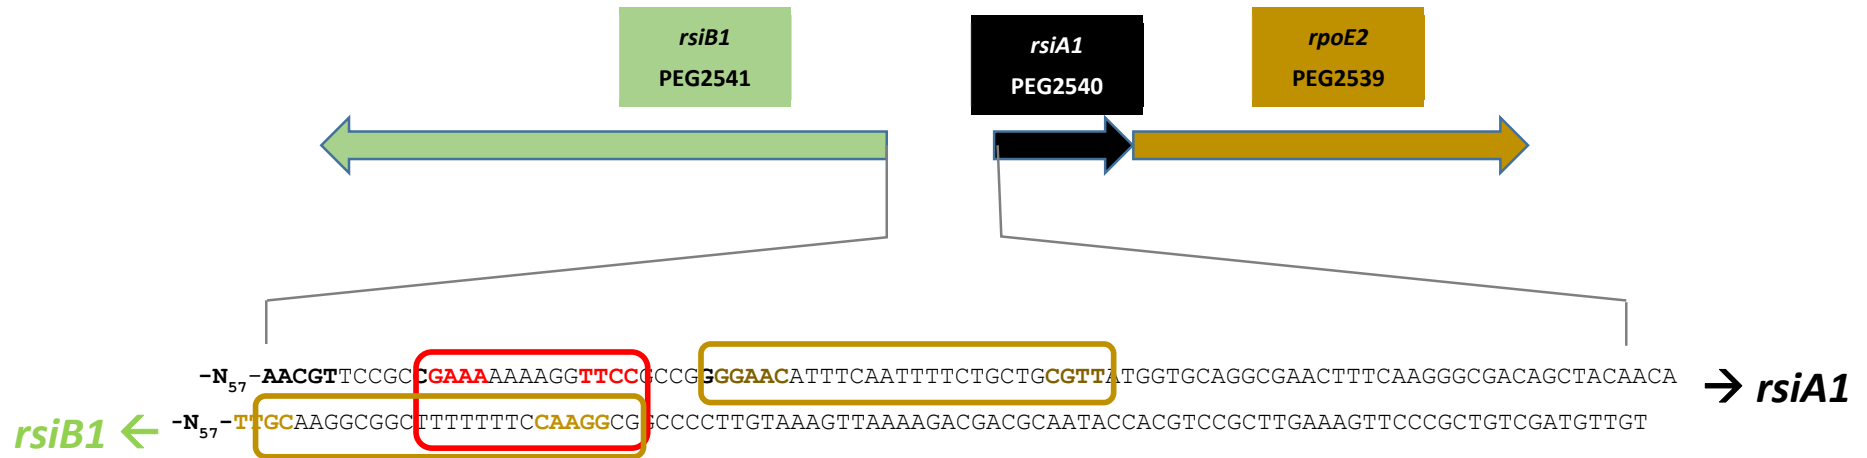

Supplement: s1 [file s1]
